# Supplementary material for: Maternal diabetes and the risk of feeding and eating disorders in offspring: a national population-based cohort study
Source: HighWire-hosted journal article supplement (doi:10.1136/bmjdrc-2020-001738), 2020-10-01
Supplement: bmjdrc-2020-001738supp001_data_supplement.pdf [file bmjdrc-2020-001738supp001_data_supplement.pdf]

Supplementary Table 1 Association between maternal diabetes and risk of feeding and eating disorders in offspring excluding preterm birth (n=1 133 738)

| Exposure                | No. of cases | Rate per 1000 person-years | HR (95% CI)       |                   |
|-------------------------|--------------|----------------------------|-------------------|-------------------|
|                         |              |                            | Model 1           | Model 2           |
| No diabetes             | 1716         | 0.26                       | Ref 1.00          | Ref 1.00          |
| Maternal diabetes       | 108          | 0.51                       | 1.77 (1.46, 2.16) | 1.60 (1.30, 1.98) |
| Pregestational diabetes | 61           | 0.60                       | 2.05 (1.59, 2.65) | 1.89 (1.44, 2.49) |
| Type 1 diabetes         | 34           | 0.52                       | 1.78 (1.27, 2.51) | 1.59 (1.10, 2.30) |
| Type 2 diabetes         | 27           | 0.73                       | 2.53 (1.73, 3.71) | 2.43 (1.63, 3.62) |
| Gestational diabetes    | 47           | 0.43                       | 1.51 (1.13, 2.02) | 1.33 (0.98, 1.82) |

Model 1 adjusted for birth year; Model 2 additionally adjusted for sex, parity, maternal characteristics (age, education level, origin, cohabitation, smoking status during pregnancy, psychiatric disorder history) and paternal age; HR, hazard ratio;

Appendix Table 2 Association between paternal diabetic and risk of feeding and eating disorders during 1996-2015 (n=1 193 891)

| Exposure             | No. of cases | Rate per 1000 person-years | HR (95% CI) Model 1 | HR (95% CI) Model 2 |
|----------------------|--------------|----------------------------|---------------------|---------------------|
| No paternal diabetes | 2024         | 0.30                       | Ref 1.00            | Ref 1.00            |
| Paternal diabetes    | 17           | 0.26                       | 0.86 (0.53, 1.38)   | 0.71 (0.42, 1.21)   |

Model 1 adjusted for birth year; Model 2 additionally adjusted for sex, parity, maternal characteristics (age, education level, origin, cohabitation, smoking status during pregnancy, psychiatric disorder history) and paternal age; HR, hazard ratio;

Appendix Table 3 Association between maternal diabetes and risk of feeding and eating disorders in offspring using co-sibling analysis (n= 886 711)

| Exposure                | No. of cases | Rate per 1000 person-years | HR (95% CI)       |                   |
|-------------------------|--------------|----------------------------|-------------------|-------------------|
|                         |              |                            | Model 1           | Model 2           |
| No diabetes             | 1421         | 0.28                       | Ref 1.00          | Ref 1.00          |
| Maternal diabetes       | 84           | 0.50                       | 1.65 (1.32, 2.06) | 1.54 (1.22, 1.94) |
| Pregestational diabetes | 47           | 0.55                       | 1.80 (1.35, 2.41) | 1.76 (1.31, 2.38) |
| Type 1 diabetes         | 32           | 0.57                       | 1.88 (1.32, 2.67) | 1.80 (1.25, 2.59) |
| Type 2 diabetes         | 15           | 0.50                       | 1.67 (1.00, 2.75) | 1.70 (1.02, 2.84) |
| Gestational diabetes    | 37           | 0.45                       | 1.49 (1.08, 2.07) | 1.32 (0.93, 1.86) |

Model 1 adjusted for birth year; Model 2 additionally adjusted for sex, parity, maternal characteristics (age, education level, origin, cohabitation, smoking status during pregnancy, psychiatric disorder history) and paternal age; HR, hazard ratio;

Appendix Table 4 Association between maternal diabetes and risk of feeding and eating disorders in offspring born during 2004-2015

| Exposure                | No. of cases | Rate per 1000 person-years | HR (95% CI)       |                   |
|-------------------------|--------------|----------------------------|-------------------|-------------------|
|                         |              |                            | Model 1           | Model 2           |
| No diabetes             | 1313         | 0.33                       | Ref 1.00          | Ref 1.00          |
| Maternal diabetes       | 111          | 0.58                       | 1.77 (1.45, 2.14) | 1.63 (1.31, 2.03) |
| Pregestational diabetes | 66           | 0.68                       | 2.06 (1.61, 2.64) | 1.93 (1.47, 2.53) |
| Type 1 diabetes         | 38           | 0.61                       | 1.84 (1.33, 2.54) | 1.71 (1.20, 2.43) |
| Type 2 diabetes         | 28           | 0.81                       | 2.45 (1.69, 3.56) | 2.34 (1.56, 3.53) |
| Gestational diabetes    | 45           | 0.48                       | 1.46 (1.08, 1.97) | 1.31 (0.93, 1.84) |

Model 1 adjusted for birth year; Model 2 additionally adjusted for sex, parity, maternal characteristics (age, education level, origin, cohabitation, smoking status during pregnancy, psychiatric disorder history, pregestational body mass index) and paternal age; HR, hazard ratio;

Appendix Table 5 Association between maternal diabetes and risk of feeding and eating disorders in offspring stratified by sex

| Exposure                | No. of cases | Rate per 1000 person-years | HR (95% CI)<br>Model 1 | HR (95% CI)<br>Model 2 |
|-------------------------|--------------|----------------------------|------------------------|------------------------|
| <b>For boys</b>         |              |                            |                        |                        |
| No diabetes             | 939          | 0.27                       | Ref 1.00               | Ref 1.00               |
| Maternal diabetes       | 54           | 0.44                       | 1.54 (1.17, 2.02)      | 1.33 (0.98, 1.80)      |
| Pregestational diabetes | 33           | 0.55                       | 1.89 (1.33, 2.68)      | 1.81 (1.25, 2.61)      |
| Type 1 diabetes         | 21           | 0.54                       | 1.87 (1.21, 2.88)      | 1.80 (1.14, 2.84)      |
| Type 2 diabetes         | 12           | 0.56                       | 1.93 (1.09, 3.41)      | 1.83 (1.07, 3.32)      |
| Gestational diabetes    | 21           | 0.34                       | 1.19 (0.77, 1.83)      | 0.86 (0.52, 1.44)      |
| <b>For girls</b>        |              |                            |                        |                        |
| No diabetes             | 1 027        | 0.31                       | Ref 1.00               | Ref 1.00               |
| Maternal diabetes       | 79           | 0.70                       | 2.06 (1.64-2.60)       | 1.93 (1.51, 2.46)      |
| Pregestational diabetes | 46           | 0.81                       | 2.38 (1.77-3.20)       | 2.19 (1.60, 3.01)      |
| Type 1 diabetes         | 23           | 0.64                       | 1.84 (1.22-2.79)       | 1.66 (1.07, 2.59)      |
| Type 2 diabetes         | 23           | 1.14                       | 3.36 (2.22-5.09)       | 3.16 (2.04, 4.89)      |
| Gestational diabetes    | 33           | 0.59                       | 1.74 (1.23-2.46)       | 1.67 (1.16, 2.39)      |

Model 1 adjusted for birth year; Model 2 additionally adjusted for parity, maternal characteristics (age, education level, origin, cohabitation, smoking status during pregnancy, psychiatric disorder history) and paternal age; HR, hazard ratio;

Appendix Table 6 Association between maternal diabetes and risk of feeding and eating disorders in offspring excluding cleft lip, cleft palate, and other congenital malformations of the digestive system (n=1 182 478)

| Exposure                | No. of cases | Rate per 1000 person-years | HR (95% CI)       |                   |
|-------------------------|--------------|----------------------------|-------------------|-------------------|
|                         |              |                            | Model 1           | Model 2           |
| No diabetes             | 1887         | 0.28                       | Ref 1.00          | Ref 1.00          |
| Maternal diabetes       | 126          | 0.54                       | 1.79 (1.50, 2.15) | 1.63 (1.34, 1.98) |
| Pregestational diabetes | 77           | 0.67                       | 2.19 (1.74, 2.75) | 2.05 (1.61, 2.61) |
| Type 1 diabetes         | 43           | 0.58                       | 1.89 (1.40, 2.56) | 1.76 (1.27, 2.43) |
| Type 2 diabetes         | 34           | 0.83                       | 2.72 (1.94, 3.83) | 2.57 (1.79, 3.67) |
| Gestational diabetes    | 49           | 0.42                       | 1.40 (1.05, 1.86) | 1.22 (0.90, 1.66) |

Model 1 adjusted for birth year; Model 2 additionally adjusted for sex, parity, maternal characteristics (age, education level, origin, cohabitation, smoking status during pregnancy, psychiatric disorder history) and paternal age; HR, hazard ratio;

Appendix Table 7 Association between maternal diabetes and risk of feeding and eating disorders in offspring (n=1 193 891)

| Exposure                | No. of cases | Rate per 1000 person-years | HR (95% CI)       |                   |
|-------------------------|--------------|----------------------------|-------------------|-------------------|
|                         |              |                            | Model 1           | Model 2           |
| No diabetes             | 1999         | 0.29                       | Ref 1.00          | Ref 1.00          |
| Maternal diabetes       | 100          | 0.55                       | 1.77 (1.45, 2.17) | 1.59 (1.28, 1.98) |
| Pregestational diabetes | 42           | 0.72                       | 2.40 (1.77, 3.26) | 2.23 (1.61, 3.08) |
| Type 1 diabetes         | 24           | 0.70                       | 2.35 (1.57, 3.52) | 2.19 (1.42, 3.37) |
| Type 2 diabetes         | 18           | 0.75                       | 2.46 (1.55, 3.91) | 2.28 (1.41, 3.67) |
| Gestational diabetes    | 58           | 0.47                       | 1.49 (1.15, 1.93) | 1.31 (0.99, 1.74) |

Model 1 adjusted for birth year; Model 2 additionally adjusted for sex, parity, maternal characteristics (age, education level, origin, cohabitation, smoking status during pregnancy, psychiatric disorder history) and paternal age; HR, hazard ratio;

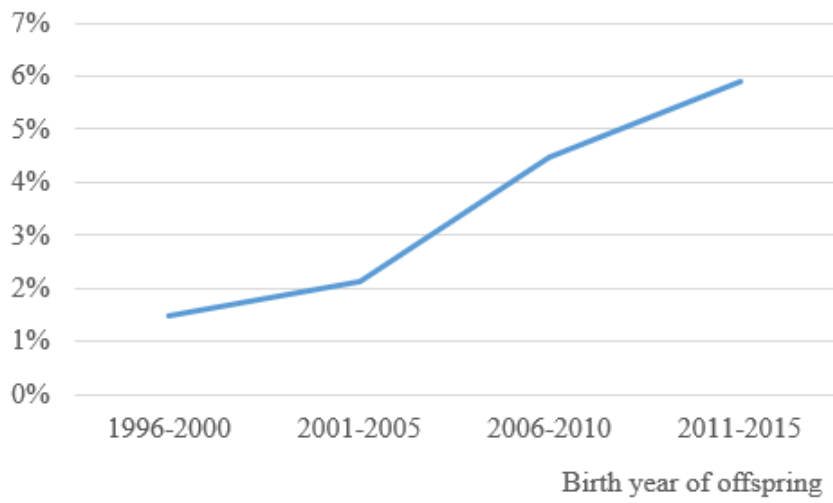

Supplementary Figure S1. The proportion of offspring born to mothers diagnosed with diabetes by birth years



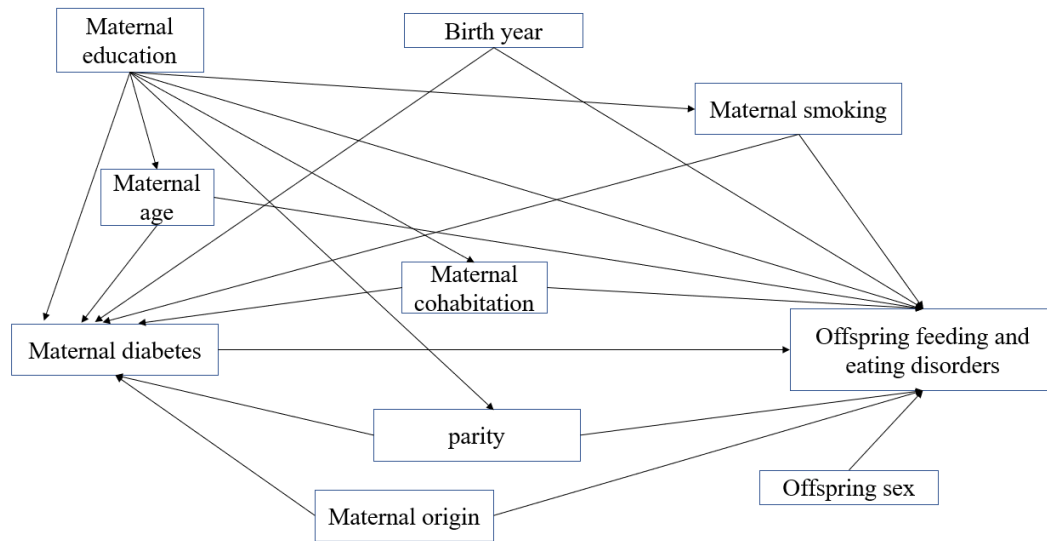

Supplementary Figure 2 Directed acyclic graphs showing selection of covariates for confounding control
